# Supplementary material for: Improved betulinic acid biosynthesis using synthetic yeast chromosome recombination and semi-automated rapid LC-MS screening
Source: PubMed Central journal article supplement (PMC7018806; doi:10.1038/s41467-020-14708-z), 2020-02-13
Supplement: 41467_2020_14708_MOESM8_ESM.pdf [file 41467_2020_14708_MOESM8_ESM.pdf]

**Title:** Supplementary Data 1, LC gradient conditions

**Description:** Summary of the LC buffer gradient used solvent A, 50% of methanol in 0.1% (v/v) formic acid in water; solvent B, 0.1% (v/v) formic acid in acetonitrile

**Title:** Supplementary Data 2, Plasmid sequences used in this study

**Description:** pGG127 was digested with Not1 and integrated into the HO locus of BY4741 yeast. pGG052 was transformed into this strain to generate yeast strain yGG066 used in this study.

**Title:** Supplementary Data 3, Gene sequences

Description. Gene sequences for non-standard YTK parts. Each sequence was integrated into pYTK001 for further construction (see main text).

**Title:** Supplementary Data 4, Summary of observed SCRaMbLE events

**Description:** Summary table indicating the type of and size of significant SCRaMbLE events that were observed SCRaMbLE strains (BC01-12). No sizable SCRaMbLE event was observed for BC05, 06, 12.
